# Supplementary material for: Resveratrol Alleviates Acute Campylobacter jejuni Induced Enterocolitis in a Preclinical Murine Intervention Study
Source: MDPI journal article supplement (doi:10.3390/microorganisms8121858), 2020-11-25
Supplement: s1 [file s1]

## Supplementary Materials

| RESVERATROL      | MIC: mmol/L (mg/L) | 0.008 (1.78) | 0.0156 (3.56) | 0.0313 (7.13) | 0.0625 (14.26) | 0.125 (28.53) | 0.25 (57.06) | 0.5 (114.13) | 1.0 (228.25) | 2.0 (456.5) | 4.0 (913.0) | 8.0 (1826.0) | MIC90: mmol/L (mg/L) | 1.0 (228.0) |
|------------------|--------------------|--------------|---------------|---------------|----------------|---------------|--------------|--------------|--------------|-------------|-------------|--------------|----------------------|-------------|
| <i>C. jejuni</i> | Number of isolates | 0            | 0             | 0             | 0              | 0             | 2            | 1            | 15           | 2           | 0           | 0            |                      |             |

**Figure S1:** Distribution of minimal inhibitory concentrations (MIC) of resveratrol among 20 *C. jejuni* isolates (in mmol/L and mg/L). The resveratrol MIC<sub>90</sub> value indicates the resveratrol concentration resulting in inhibition growth of 90% of the tested *C. jejuni* isolates;

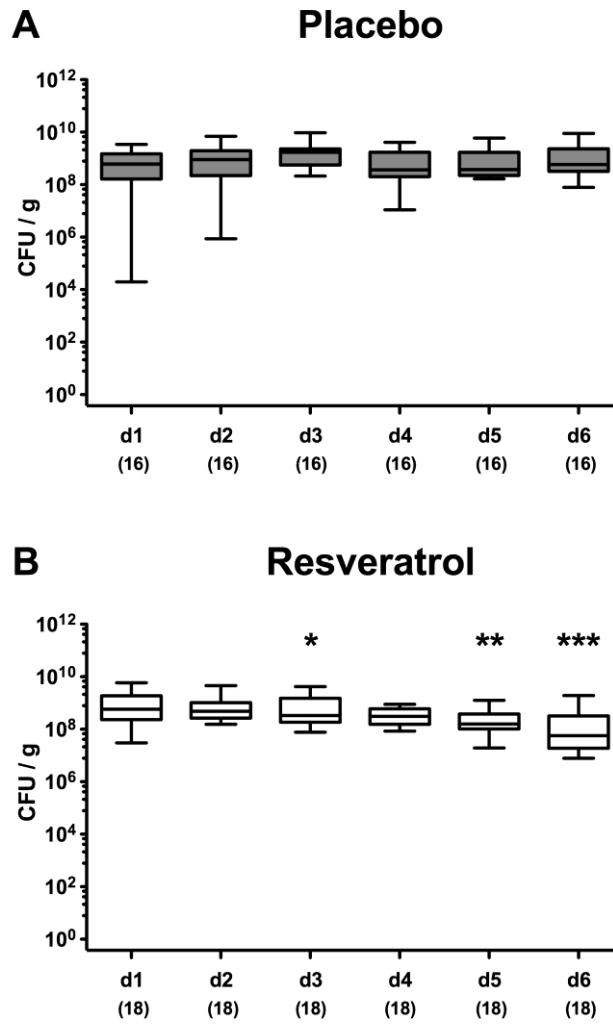

**Figure S2.** Fecal *C. jejuni* shedding over time following resveratrol treatment of infected mice suffering from acute enterocolitis.

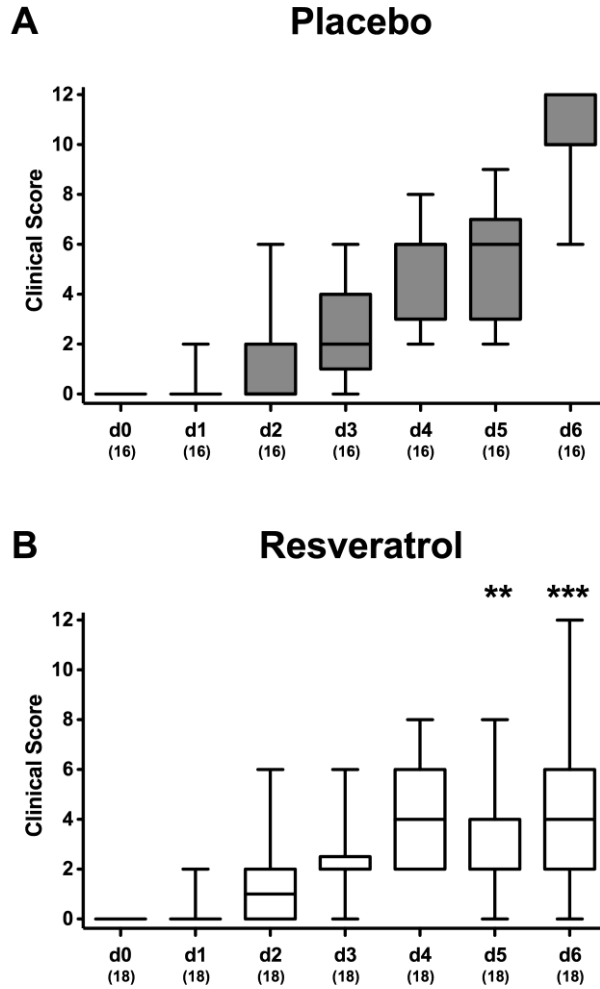

**Figure S3.** Clinical conditions over time following resveratrol treatment of infected mice suffering from acute enterocolitis.

## **A Apoptotic Cells - COLON**

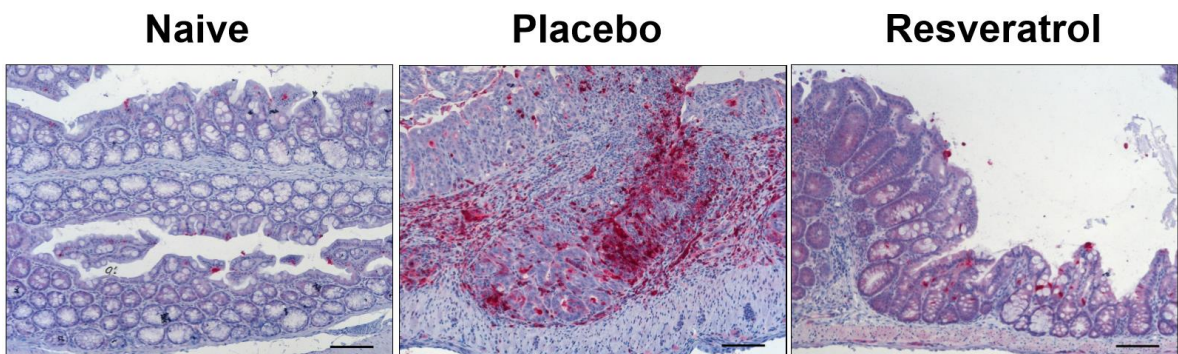

(100 x magnification, scale bar 100  $\mu$ m)

**Figure S4.** Representative photomicrographs illustrating colonic apoptotic and immune cell responses following resveratrol treatment of infected mice suffering from acute enterocolitis.
